# Supplementary material for: Structural basis of human NOX5 activation
Source: PubMed Central journal article supplement (PMC11088703; doi:10.1038/s41467-024-48467-y), 2024-05-11
Supplement: 41467_2024_48467_MOESM1_ESM.pdf [file 41467_2024_48467_MOESM1_ESM.pdf]

## **Structural Basis of Human NOX5 Activation**

### **Supplementary Information**

Supplementary Figures 1-11

Supplementary Tables 1-3

## Supplementary Figures

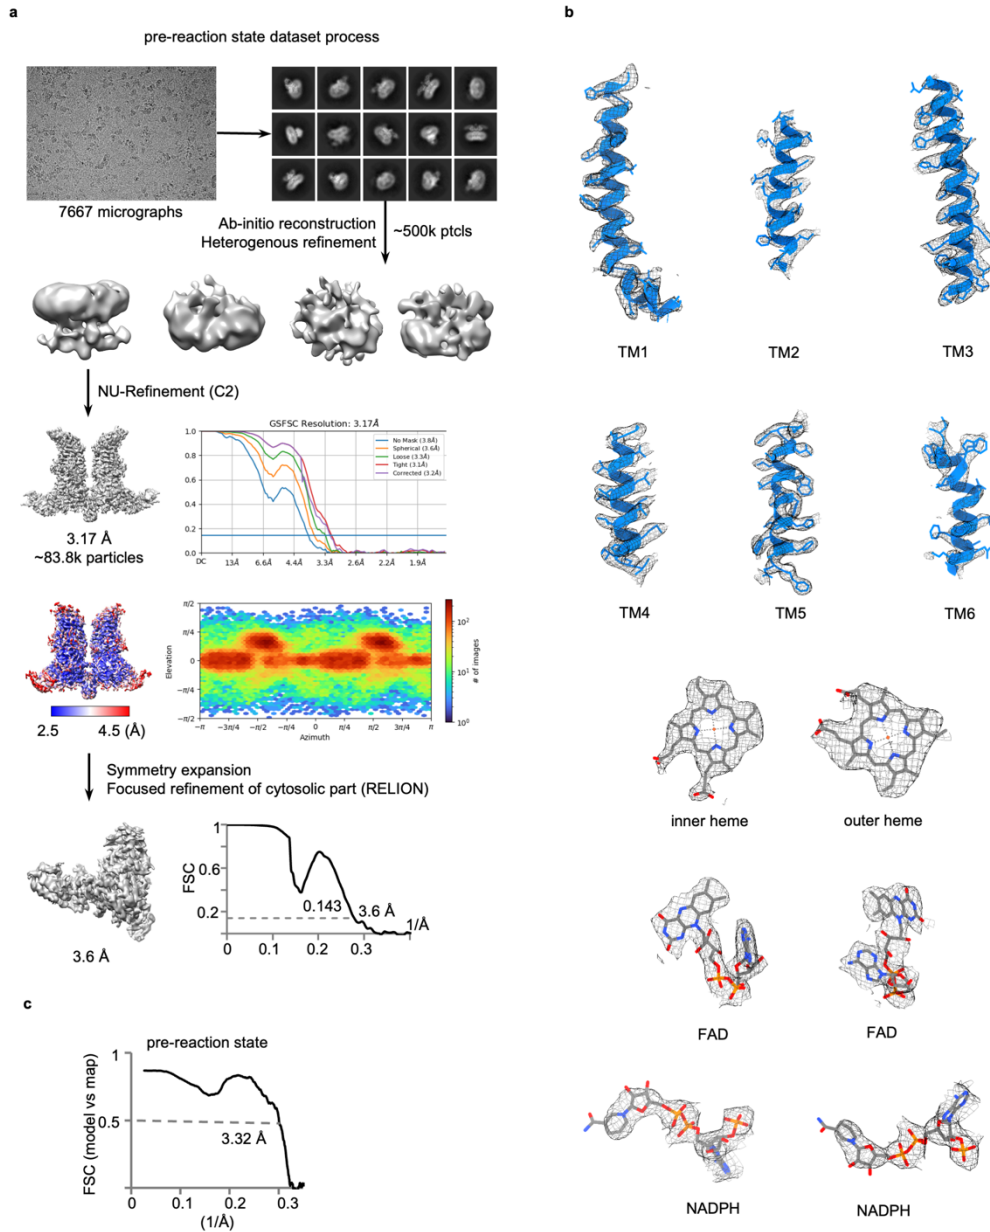

**Supplementary Figure 1** Cryo-EM image analysis of NOX5 in pre-reaction state and representative cryo-EM density maps. **a.** Cryo-EM data processing flow of NOX5 in pre-reaction state (with NADPH and EGTA). **b.** The cryo-EM densities and models of transmembrane helices

and small molecules. **c.** Fourier shell correlation (FSC) curves between model and map of NOX5 in pre-reaction state.

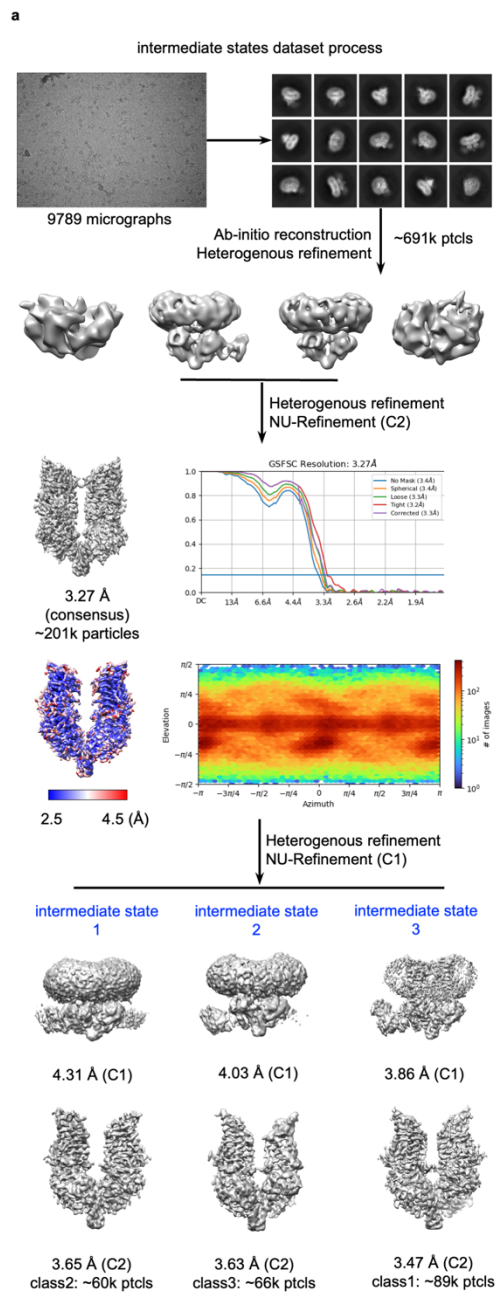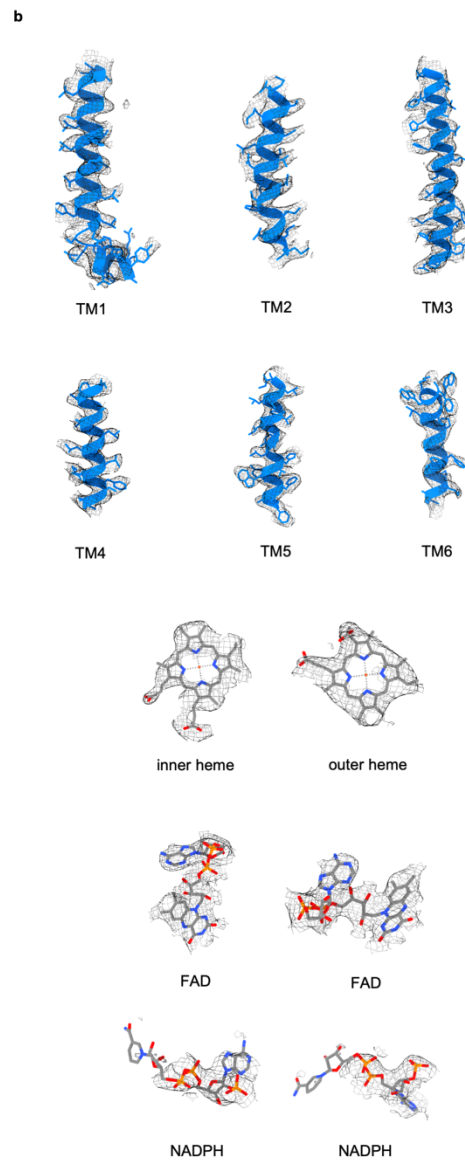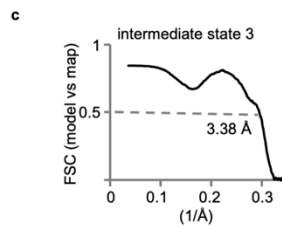

**Supplementary Figure 2** Cryo-EM image analysis of NOX5 in intermediate states and representative cryo-EM density maps. **a.** Cryo-EM data processing flow of NOX5 in intermediate states (with NADPH and  $\text{Ca}^{2+}$ ). **b.** The cryo-EM densities and models of transmembrane helices and small molecules (intermediate state 3). **c.** Fourier shell correlation (FSC) curves between model and map of NOX5 in intermediate state 3.

a

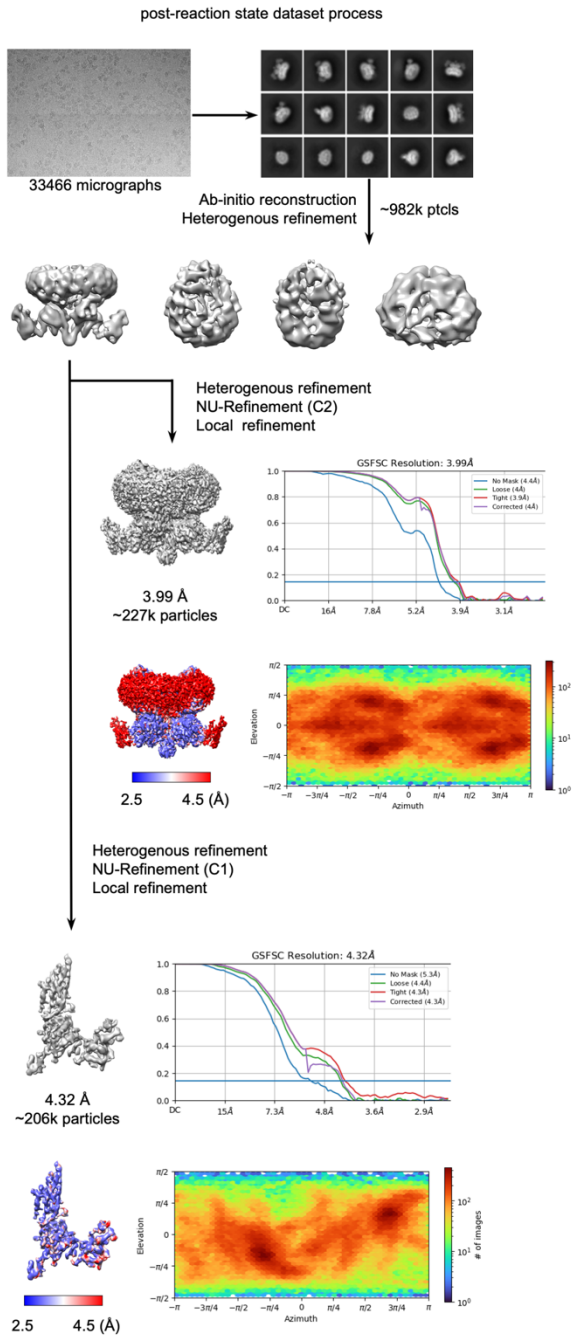

b

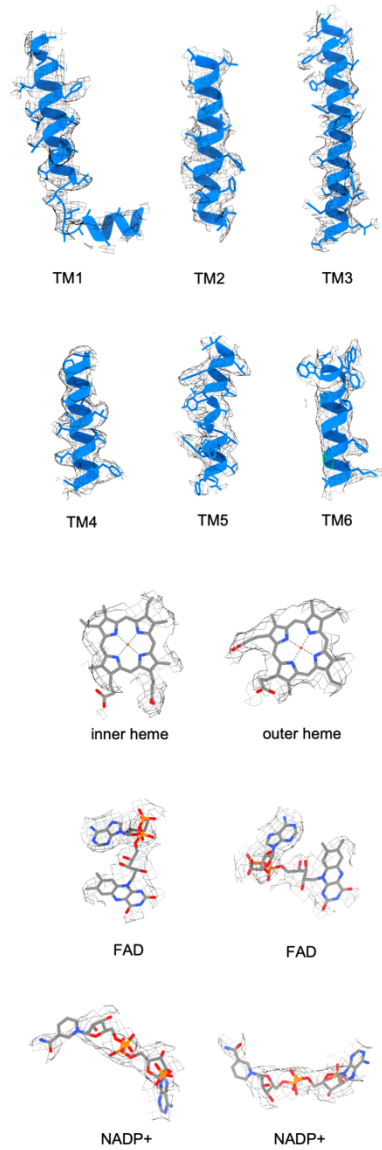

c

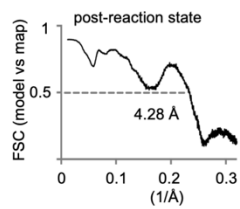

**Supplementary Figure 3** Cryo-EM image analysis of NOX5 in post-reaction state and representative cryo-EM density maps. **a.** Cryo-EM data processing flow of NOX5 in post-reaction state (with NADP<sup>+</sup> and Ca<sup>2+</sup>). **b.** The cryo-EM densities and models of transmembrane helices and small molecules. **c.** Fourier shell correlation (FSC) curves between model and map of NOX5 in post-reaction state.

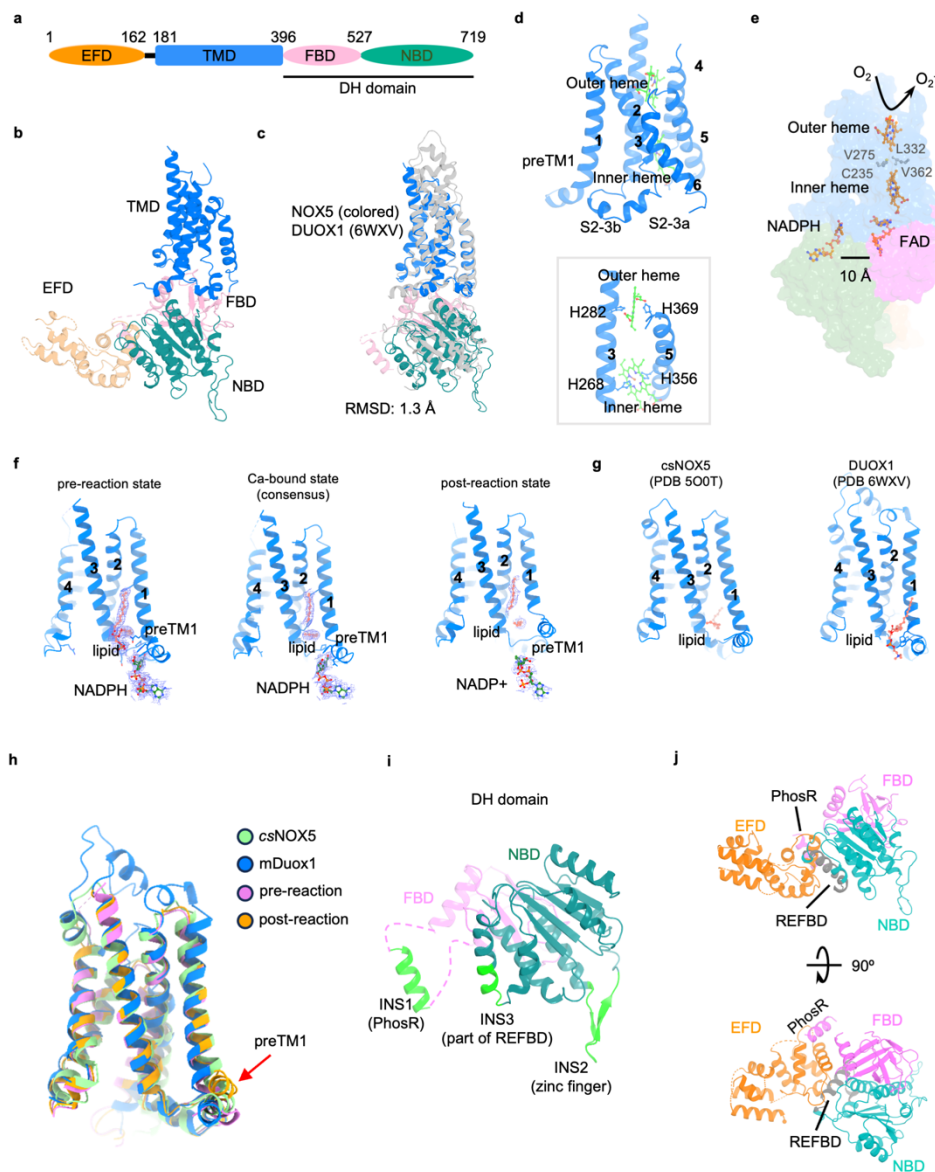

**Supplementary Figure 4** Structural features of NOX5. **a.** Domain architecture of human NOX5. **b.** Protomer structure of human NOX5. **c.** Structural comparison between human NOX5 and DUOX1 catalytic cores. NOX5 is colored and DUOX1 is in grey. **d.** The transmembrane domain of human NOX5 and the heme-coordinating residues. **e.** The electron transfer pathway in NOX5: NADPH – FAD – inner heme – outer heme - oxygen. Side chains of residues between two hemes are shown. **f.** The cryo-EM densities of lipid and NADPH for pre-reaction state, intermediate state



(consensus model) and post-reaction state. Lipid or alkyl chains are colored in red. NADPH or NADP<sup>+</sup> is colored in green. **g.** The lipid-binding pocket of csNOX5 and mouse DUOX1. Lipid or alkyl chains are colored in red. **h.** Structural comparison of preTM1 orientation between csNOX5, mouse DUOX1 and human NOX5. csNOX5 is colored in pale green. Mouse DUOX1 is colored in blue. Pre-reaction and post-reaction states of human NOX5 are colored in magenta and orange, respectively. PreTM1 is indicated with red arrow. **i.** Unique sequence insertions in the DH domain. **j.** Structural details of the cytosolic DH domain.

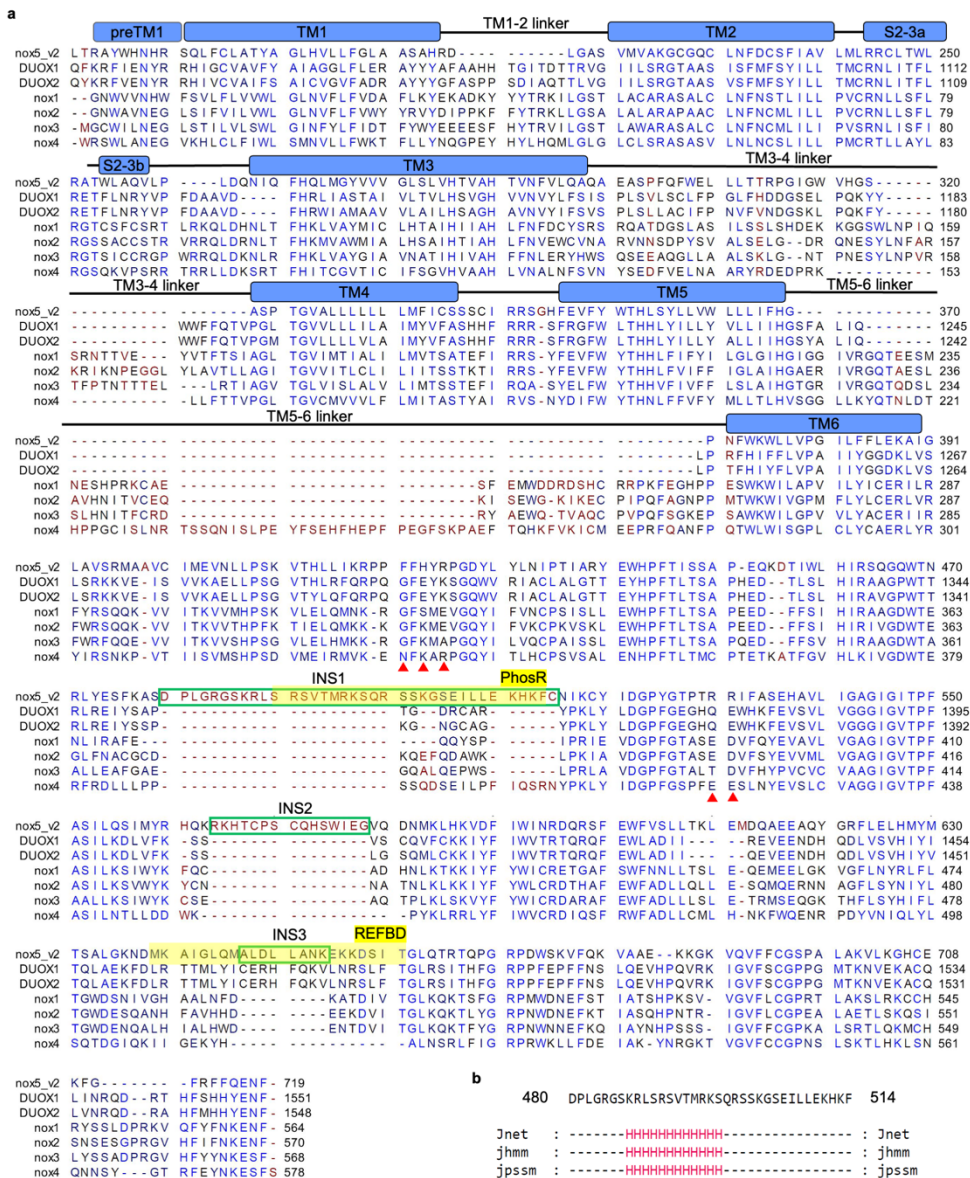

**Supplementary Figure 5** Sequence analysis of NOX5. **a.** Sequence alignment of NOX5 paralogs. Transmembrane helices are labeled as TM1-6. Sequence in green boxes are unique insertions (INS1-3) in the DH domain. PhosR and REFBD are highlighted. Dimer interface residues are indicated by red triangles and last residue of NOX4 is indicated by a red color. **b.** Secondary structure prediction of the PhosR segment by the Jpred server<sup>1</sup>.

**a**

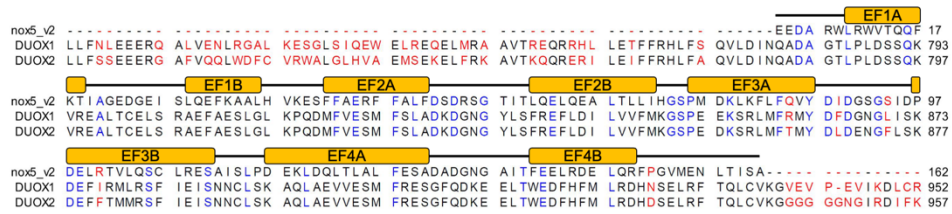

**b**

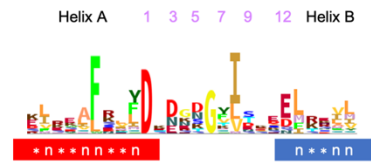

**c**

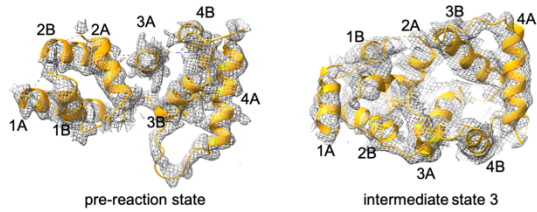

**d**

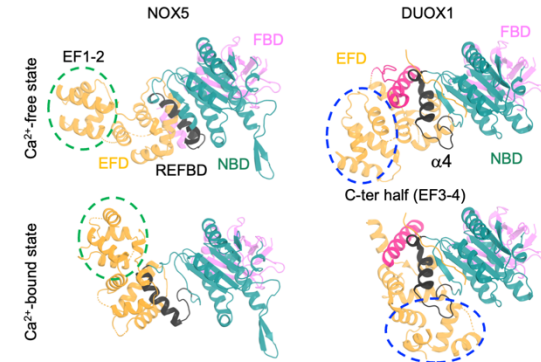

**e**

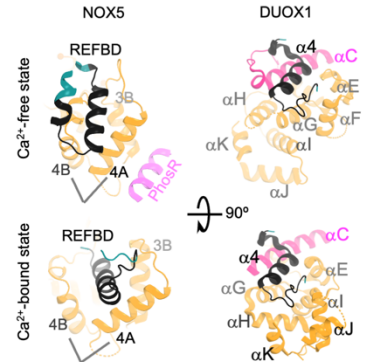

**f**

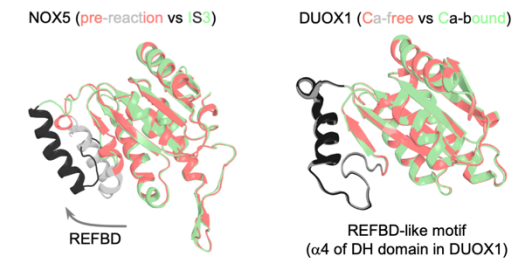

**g**

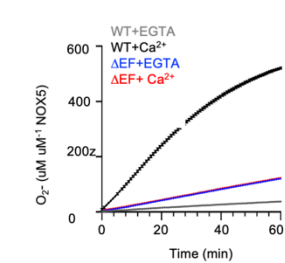

**h**

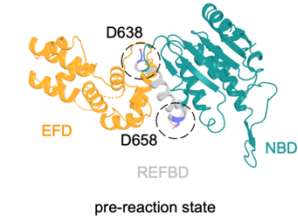

**i**

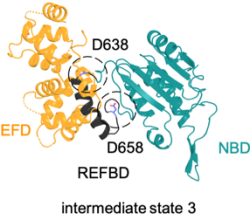

**Supplementary Figure 6** Conformational changes in EFD. **a.** Sequence alignment of the EFD. The EF hands are labeled as EF1A-EF1B to EF4A-EF4B. **b.** Canonical sequence of an EF hand. Helix A and Helix B are shown. Residue numbers of loop are indicated with 1, 3, 5, 7, 9 and 12. **c.** Cryo-EM densities of EFD with pre-reaction state and intermediate state 3. **d-e.** Comparison of the EFD between NOX5 and DUOX1 upon  $\text{Ca}^{2+}$  binding. **f.** The movement of REFBD upon activation in NOX5 and DUOX1. **g.** Impact of EFD on the enzymatic activity of NOX5. Curved are plotted (average  $\pm$ SD) with 5 technical repeats. Y-axis indicates the generation rate of  $\text{O}_2^-$  ( $\mu\text{M}/\mu\text{M}$  (NOX5)), x-axis indicates the time course (min). Source data are provided as a Source Data file. **h.** Conserved aspartates (D638 and D658) locate in REFBD with pre-reaction state. **i.** Conserved aspartates (D638 and D658) locate in REFBD with intermediate state 3.

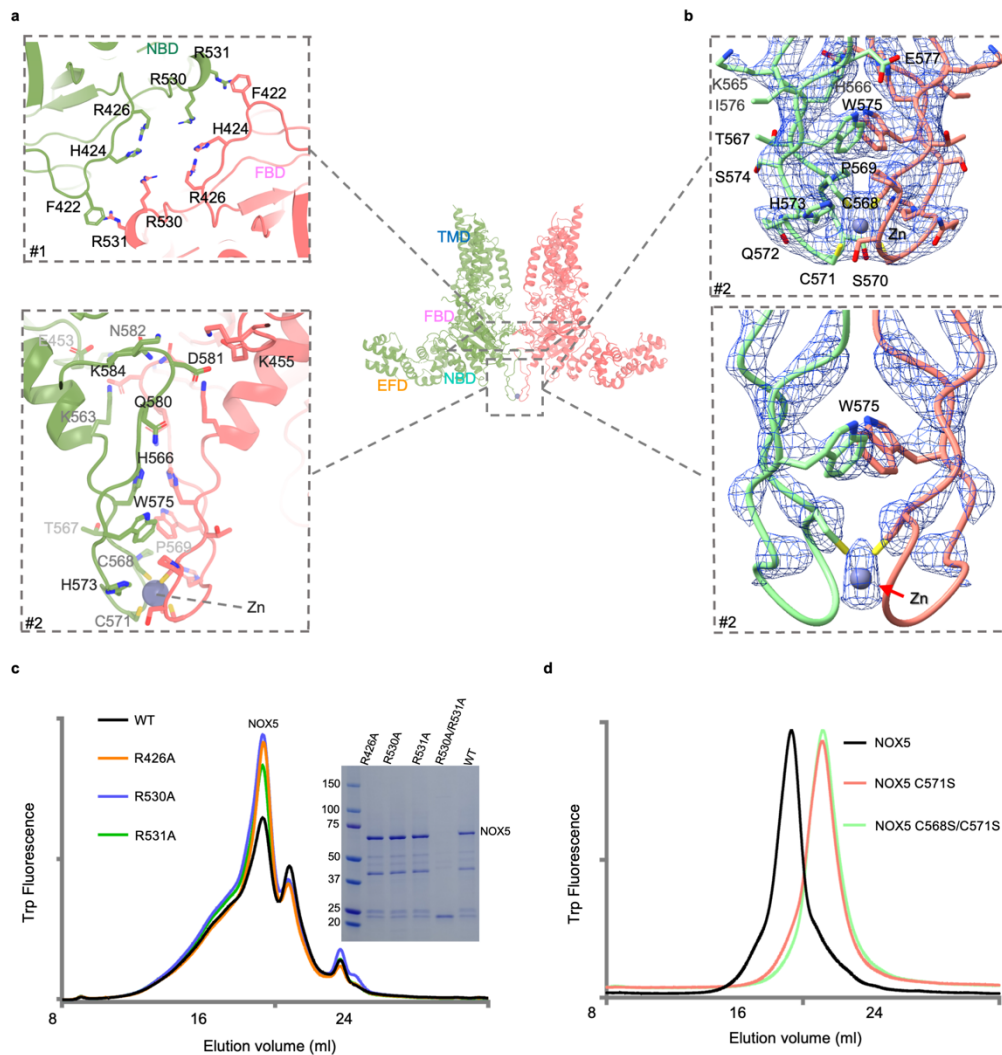

**Supplementary Figure 7** Dimer interface of NOX5. **a.** Structural details of NOX5 dimer interfaces #1 and #2. **b.** The cryo-EM density of the dimer interface #2 near the zinc-binding site. Top panel and bottom panel show the cryo-EM densities of interface #2 near the zinc-binding site with level threshold values of 0.58 and 0.88 (in ChimeraX), respectively. Zinc density is indicated with red arrow. **c.** Gel filtration curves of NOX5 and interface mutants (R426A, R530A and R531A) using a Superose 6 increase column by monitoring Trp fluorescence. SDS-PAGE of the purified constructs are shown. We couldn't purify the R530A/R531A double mutation. Source data are provided as a Source Data file. **d.** Gel filtration curves of NOX5 and putative zinc-binding cysteine

mutants (C571S and C568S/C571S) using a Superose 6 increase column by monitoring Trp fluorescence. We couldn't purify the C568S mutation. Source data are provided as a Source Data file.

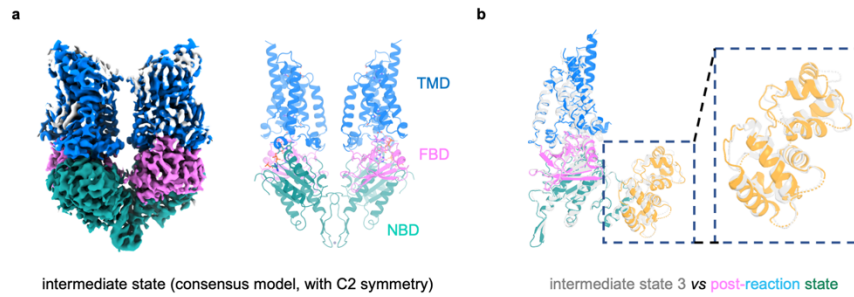

**Supplementary Figure 8** Consensus structure of the intermediate state. **a.** Cryo-EM map (left panel) and atomic model (right panel) of the NOX5 intermediate state (consensus model, with C2 symmetry) are shown. **b.** Structural comparison of NOX5 protomers between post-reaction (colored) state and intermediate state 3 (grey).

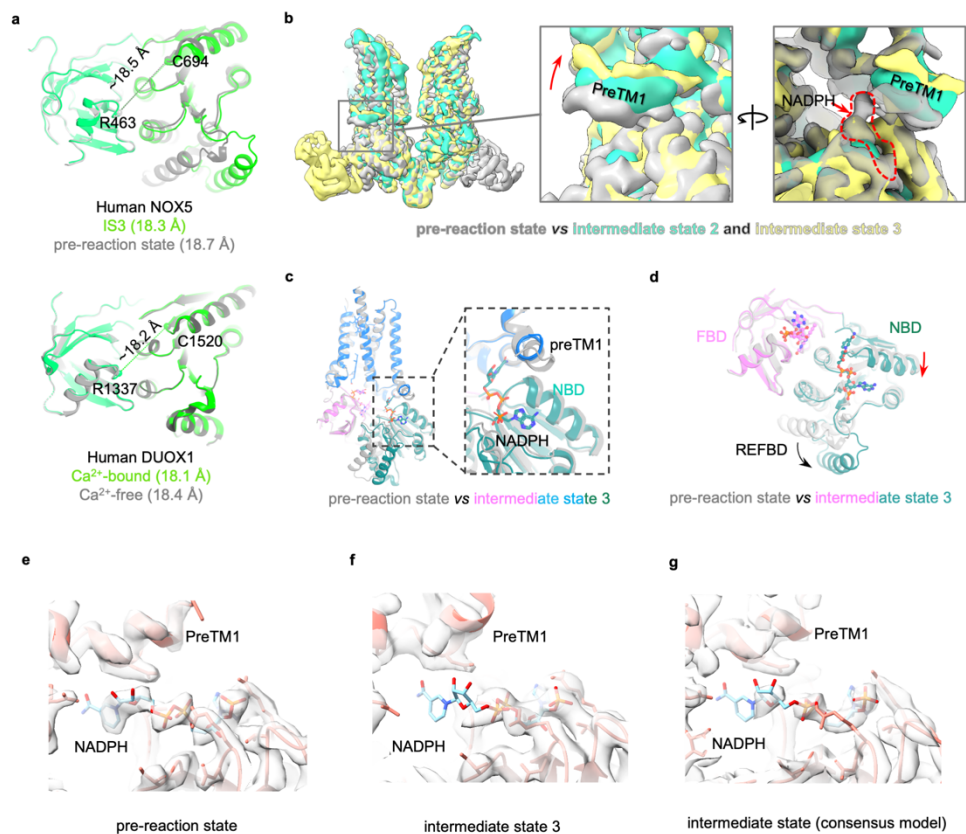

**Supplementary Figure 9** Structural comparison in the catalytic core of NOX5 before and after Ca<sup>2+</sup> activation. **a.** Distance between NBD and FBD in human NOX5 and DUOX1 structures. Pre-reaction state and intermediate 3 of NOX5 are colored in grey and green, respectively. Ca<sup>2+</sup>-free and Ca<sup>2+</sup>-bound structures of DUOX1 are colored in grey and green, respectively. **b.** The movement of preTM1 densities between pre-reaction state and intermediate states. Pre-reaction state, intermediate state 2 and intermediate state 3 are colored in grey, cyan and yellow, respectively. **c.** Structural alignment of the NOX5 catalytic cores with pre-reaction state and intermediate state 3. The NADPH-binding site is zoomed in to show the movement of preTM1 relative to the rest. **d.** The subtle movement of NBD in response to the REFBD displacement. **e.** The local cryo-EM density near NADPH of pre-reaction state. **f.** The local cryo-EM density near



NADPH of intermediate state 3. **g.** The local cryo-EM density near NADPH of intermediate state (consensus model).

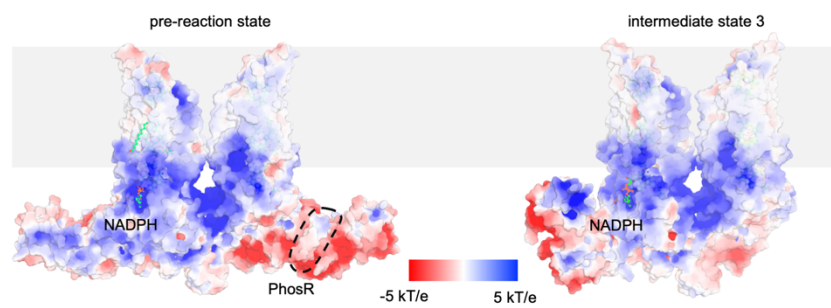

**Supplementary Figure 10** Electrostatic surface representation of NOX5 in pre-reaction state and intermediate state 3. The PhosR segment is indicated by a black dashed cycle.

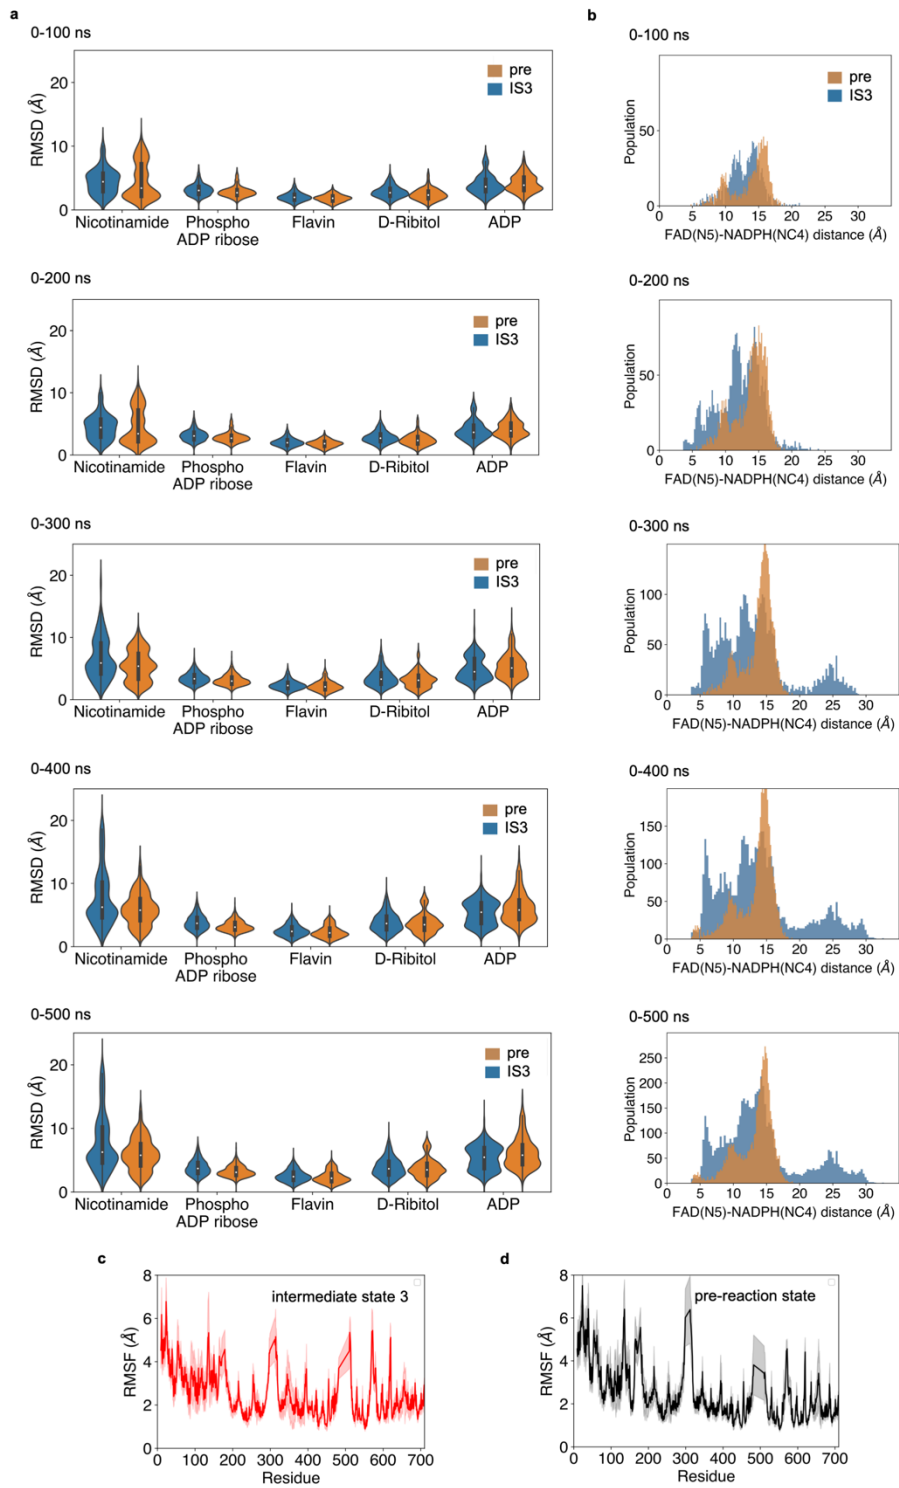

**Supplementary Figure 11** Fractions of MD simulation. **a.** The RMSD of chemical groups from NADPH and FAD in pre-reaction state and intermediate state 3 at every 100 ns up to 500 ns, showing data convergence. The minima, maxima, centre, 25% percentile and 75% percentile of groups are provided with Supplementary Table 3. The figure of 0-500 ns is the same as Figure 3e and the minima, maxima, centre, 25% percentile and 75% percentile values are described in legend. The bar covers 25% and 75% of the data. All data are plotted on the violin plot. Pre and IS3 represent pre-reaction state and intermediate state 3, respectively. Data in all triplicates are combined to a single histogram. **b.** Distance distribution between FAD and NADPH in pre-reaction state and intermediate state 3 at every 100 ns up to 500 ns, showing data convergence. Data in all triplicates are combined to a single histogram. Pre and IS3 represent pre-reaction state and intermediate state 3, respectively. **c.** The root mean square fluctuation (RMSF) analysis of NOX5 amino acid side chains with intermediate state 3 (red) over 500 ns (n=6). **d.** The root mean square fluctuation (RMSF) analysis of NOX5 amino acid side chains with pre-reaction state (black) over 500 ns (n=6). The shaded region shows the standard deviation. Data in all triplicates are combined to a single histogram.

## Supplementary Tables

**Supplementary Table 1 Cryo-EM data collection, refinement and validation statistics.**

|                                                  | NOX5<br>(EGTA-<br>NADPH)<br>(EMDB-<br>42014)<br>(PDB 8U85) | NOX5 (Ca-NADPH)                                |               |                               |                                                 | NOX5 (Ca-NADP+)<br>(EMDB-42013)<br>(PDB 8U7Y) |
|--------------------------------------------------|------------------------------------------------------------|------------------------------------------------|---------------|-------------------------------|-------------------------------------------------|-----------------------------------------------|
|                                                  |                                                            | Consensus<br>(EMDB-<br>42015)<br>(PDB<br>8U86) | Ca state<br>1 | Ca state<br>2                 | Ca state 3<br>(EMDB-<br>42016)<br>(PDB<br>8U87) |                                               |
| <b>Data collection and processing</b>            |                                                            |                                                |               |                               |                                                 |                                               |
| Magnification                                    | 105,000                                                    |                                                | 105,000       |                               |                                                 | 130,000                                       |
| Voltage (kV)                                     | 300                                                        |                                                | 300           |                               |                                                 | 300                                           |
| Electron exposure (e-/Å <sup>2</sup> )           | 82.6                                                       |                                                | 81.8          |                               |                                                 | 76.886                                        |
| Defocus range (µm)                               | 0.8~1.6                                                    |                                                | 0.8~1.6       |                               |                                                 | 1~2.6                                         |
| Pixel size (Å)                                   | 0.826                                                      |                                                | 0.826         |                               |                                                 | 0.6485                                        |
| Symmetry imposed                                 | C2                                                         | C2                                             | C1            | C1                            | C1                                              | C2                                            |
| Initial particle images (no.)                    | 1,373,175                                                  |                                                | 2,001,493     |                               |                                                 | 2,058,434                                     |
| Final particle images (no.)                      | 83,823                                                     | 201,424                                        | 60,435        | 66,111                        | 89,751                                          | 220,000                                       |
| Map resolution (Å)                               | 3.2                                                        | 3.3                                            | 4.31          | 4.03                          | 3.86                                            | 4.06                                          |
| FSC threshold                                    | 0.143                                                      | 0.143                                          | 0.143         | 0.143                         | 0.143                                           | 0.143                                         |
| Map resolution range (Å)                         | 2.5-30                                                     | 2.5-30                                         | 3.5-30        | 3-30                          | 3-30                                            | 3-30                                          |
| <b>Refinement</b>                                |                                                            |                                                |               |                               |                                                 |                                               |
| Initial model used<br>(PDB code)                 | 5O0T<br>5O0X                                               |                                                |               |                               |                                                 |                                               |
| Model resolution (Å)                             | 3.3                                                        | 3.5                                            | N/A           | N/A                           | 3.8                                             | 4.3                                           |
| FSC threshold                                    | 0.5                                                        | 0.5                                            |               |                               | 0.5                                             | 0.5                                           |
| Model resolution range (Å)                       | 3.3-30                                                     | 3.5-30                                         |               |                               | 3.8-30                                          | 4.3-30                                        |
| Map sharpening <i>B</i> factor (Å <sup>2</sup> ) | -118                                                       | -140                                           | -136          | -160                          | -135                                            | -172                                          |
| Model composition                                |                                                            |                                                |               |                               |                                                 |                                               |
| Non-hydrogen atoms                               | 10203                                                      | 7623                                           |               |                               | 8575                                            | 8803                                          |
| Protein residues                                 | 719                                                        | 719                                            |               |                               | 719                                             | 719                                           |
| Ligands                                          | HEB (2),<br>NDP,<br>FAD, PX2,<br>ZN                        | HEB (2), NDP,<br>FAD, D12, D10,<br>ZN          |               | HEB (2), NDP,<br>FAD, D12, ZN |                                                 | HEC (2), NAP,<br>FAD, D12, D10,<br>ZN         |
| <i>B</i> factors (Å <sup>2</sup> )               |                                                            |                                                |               |                               |                                                 |                                               |
| Protein                                          | 65.32                                                      | 27.45                                          |               |                               | 80.59                                           | 80.96                                         |
| Ligand                                           | 37.37                                                      | 20.23                                          |               |                               | 68.86                                           | 52.80                                         |
| R.m.s. deviations                                |                                                            |                                                |               |                               |                                                 |                                               |
| Bond lengths (Å)                                 | 0.009                                                      | 0.006                                          | N/A           | N/A                           | 0.005                                           | 0.003                                         |
| Bond angles (°)                                  | 0.788                                                      | 0.704                                          |               |                               | 0.643                                           | 0.639                                         |
| Validation                                       |                                                            |                                                |               |                               |                                                 |                                               |
| MolProbity score                                 | 1.94                                                       | 2.03                                           | N/A           | N/A                           | 1.98                                            | 1.80                                          |
| Clashscore                                       | 11.24                                                      | 11.72                                          |               |                               | 12.80                                           | 7.36                                          |
| Poor rotamers (%)                                | 0.61                                                       | 0.79                                           |               |                               | 0.00                                            | 0.00                                          |
| Ramachandran plot                                |                                                            |                                                |               |                               |                                                 |                                               |
| Favored (%)                                      | 94.51                                                      | 92.92                                          | N/A           | N/A                           | 94.73                                           | 94.19                                         |
| Allowed (%)                                      | 5.49                                                       | 7.08                                           |               |                               | 5.27                                            | 5.81                                          |
| Disallowed (%)                                   | 0.00                                                       | 0.00                                           |               |                               | 0.00                                            | 0.00                                          |

**Supplementary Table 1 Cryo-EM data collection, refinement and validation statistics.**

**Supplementary Table 2 System set-up detail.**

| System               | Box dimension                      | NOX5 | Heme-B | NADPH | FAD | Zn | POPC | Na <sup>+</sup> | Cl <sup>-</sup> | TIP3P water |
|----------------------|------------------------------------|------|--------|-------|-----|----|------|-----------------|-----------------|-------------|
| Pre-reaction state   | 15.8 x 15.8 x 13.9 nm <sup>3</sup> | 2    | 4      | 2     | 2   | 1  | 735  | 220             | 216             | 78739       |
| Intermediate state 3 | 15.8 x 15.8 x 13.7 nm <sup>3</sup> | 2    | 4      | 2     | 2   | 1  | 733  | 218             | 214             | 77602       |

**Supplementary Table 2 System set-up detail.**

**Supplementary Table 3 Maxima, Minima and percentile values of Supplementary Figure 11a.**

| Group              | Intermediate state 3 |        |        |                |                | Pre-reaction state |        |        |                |                |
|--------------------|----------------------|--------|--------|----------------|----------------|--------------------|--------|--------|----------------|----------------|
|                    | Centre               | Maxima | Minima | 75% percentile | 25% percentile | Centre             | Maxima | Minima | 75% percentile | 25% percentile |
| 0-100 ns           |                      |        |        |                |                |                    |        |        |                |                |
| Nicotinamide       | 4.42                 | 11.91  | 0.00   | 5.76           | 2.90           | 3.42               | 12.96  | 0.03   | 7.24           | 2.15           |
| Phospho-ADP-ribose | 3.07                 | 6.64   | 0.00   | 3.67           | 2.46           | 2.70               | 6.22   | 0.03   | 3.17           | 2.29           |
| Flavin             | 1.97                 | 4.64   | 0.00   | 2.43           | 1.57           | 1.83               | 3.66   | 0.04   | 2.20           | 1.41           |
| D-ribitol          | 2.71                 | 6.65   | 0.00   | 3.38           | 2.18           | 2.34               | 6.00   | 0.03   | 2.94           | 1.79           |
| ADP                | 3.66                 | 9.33   | 0.00   | 4.79           | 2.89           | 3.88               | 8.53   | 0.04   | 5.11           | 3.10           |
| 0-200 ns           |                      |        |        |                |                |                    |        |        |                |                |
| Nicotinamide       | 5.13                 | 19.67  | 0.00   | 6.65           | 3.50           | 5.10               | 12.96  | 0.03   | 7.45           | 2.84           |
| Phospho-ADP-ribose | 3.15                 | 6.64   | 0.00   | 3.71           | 2.61           | 2.89               | 7.44   | 0.03   | 3.41           | 2.44           |
| Flavin             | 2.11                 | 4.64   | 0.00   | 2.52           | 1.71           | 1.91               | 4.00   | 0.04   | 2.33           | 1.50           |
| D-ribitol          | 2.98                 | 7.43   | 0.00   | 3.77           | 2.41           | 2.76               | 6.00   | 0.03   | 3.38           | 1.98           |
| ADP                | 4.16                 | 9.84   | 0.00   | 5.57           | 3.23           | 4.91               | 11.33  | 0.04   | 6.04           | 3.56           |
| 0-300 ns           |                      |        |        |                |                |                    |        |        |                |                |
| Nicotinamide       | 5.90                 | 21.11  | 0.00   | 9.10           | 4.14           | 5.38               | 12.96  | 0.03   | 7.43           | 3.30           |
| Phospho-ADP-ribose | 3.35                 | 7.88   | 0.00   | 4.01           | 2.76           | 3.00               | 7.44   | 0.03   | 3.62           | 2.50           |
| Flavin             | 2.26                 | 5.49   | 0.00   | 2.77           | 1.80           | 2.08               | 6.13   | 0.04   | 2.65           | 1.62           |
| D-ribitol          | 3.31                 | 9.17   | 0.00   | 4.33           | 2.50           | 3.13               | 8.56   | 0.03   | 3.92           | 2.20           |
| ADP                | 4.50                 | 13.74  | 0.00   | 6.60           | 3.39           | 5.10               | 13.98  | 0.04   | 6.54           | 3.85           |
| 0-400 ns           |                      |        |        |                |                |                    |        |        |                |                |
| Nicotinamide       | 6.29                 | 22.51  | 0.00   | 9.95           | 4.22           | 5.58               | 15.07  | 0.03   | 7.85           | 3.64           |
| Phospho-ADP-ribose | 3.55                 | 8.13   | 0.00   | 4.40           | 2.87           | 3.07               | 7.44   | 0.03   | 3.76           | 2.60           |
| Flavin             | 2.32                 | 5.68   | 0.00   | 2.95           | 1.78           | 2.16               | 6.13   | 0.04   | 2.86           | 1.64           |
| D-ribitol          | 3.47                 | 9.17   | 0.00   | 4.59           | 2.58           | 3.37               | 8.96   | 0.03   | 4.28           | 2.44           |
| ADP                | 5.07                 | 13.74  | 0.00   | 6.91           | 3.48           | 5.55               | 13.98  | 0.04   | 7.10           | 4.20           |

**Supplementary Table 3 Maxima, Minima and percentile values of Supplementary Figure 11a.**

## Supplementary References

- 1 Drozdetskiy, A., Cole, C., Procter, J. & Barton, G. J. JPred4: a protein secondary structure prediction server. *Nucleic acids research* 43, W389-W394 (2015).
