# Supplementary material for: Structural basis of human NOX5 activation
Source: PubMed Central journal article supplement (PMC11088703; doi:10.1038/s41467-024-48467-y), 2024-05-11
Supplement: 41467_2024_48467_MOESM3_ESM.pdf [file 41467_2024_48467_MOESM3_ESM.pdf]

## **Description of Additional Supplementary Files**

### **File Name: Supplementary Movie 1**

**Description:** Ca<sup>2+</sup>-dependent conformational changes of NOX5 from pre-reaction to intermediate state 3. TMD, FBD, NBD and EFD are colored in blue, pink, dark green, and orange, respectively.
